# Supplementary material
Source: PubMed Central journal article supplement (PMC5694947)
Supplement: EMBJ-36-520-s001.pdf [file EMBJ-36-520-s001.pdf]

## Expanded View Figures

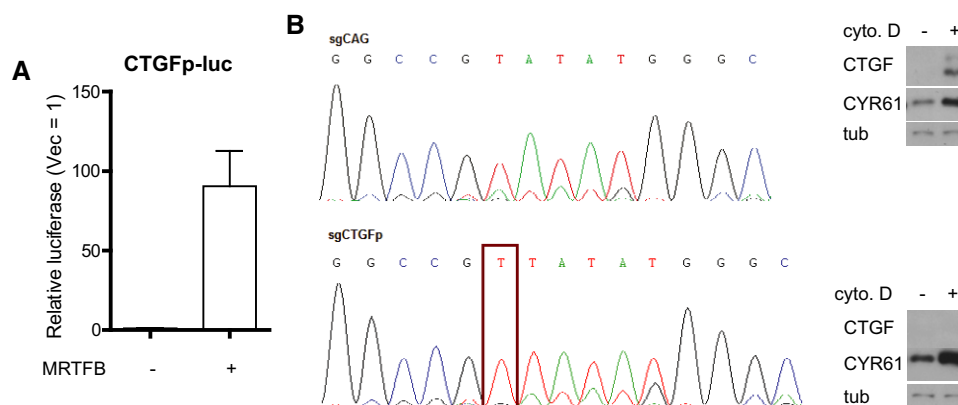

**Figure EV1. SRF activity-independent regulation of TEAD-YAP target genes by MRTF.**

A CTGF luciferase reporter assay in 293T cells expressing MRTFB. Data are presented as means  $\pm$  s.e.m. ( $n = 3$ ).

B (left) Genomic sequencing results for MCF-10A cells treated with CRISPR-Cas9 against control (sgCAG) or SRF-binding sequences in the CTGF promoter. A successful mutation in the SRF-binding motif (CarG box) is outlined in red. (right) Western blot confirming CTGF promoter mutant MCF-10A cells are unresponsive to SRF by treating them with cytochalasin D (cyto. D, 1  $\mu$ M, 30 min).

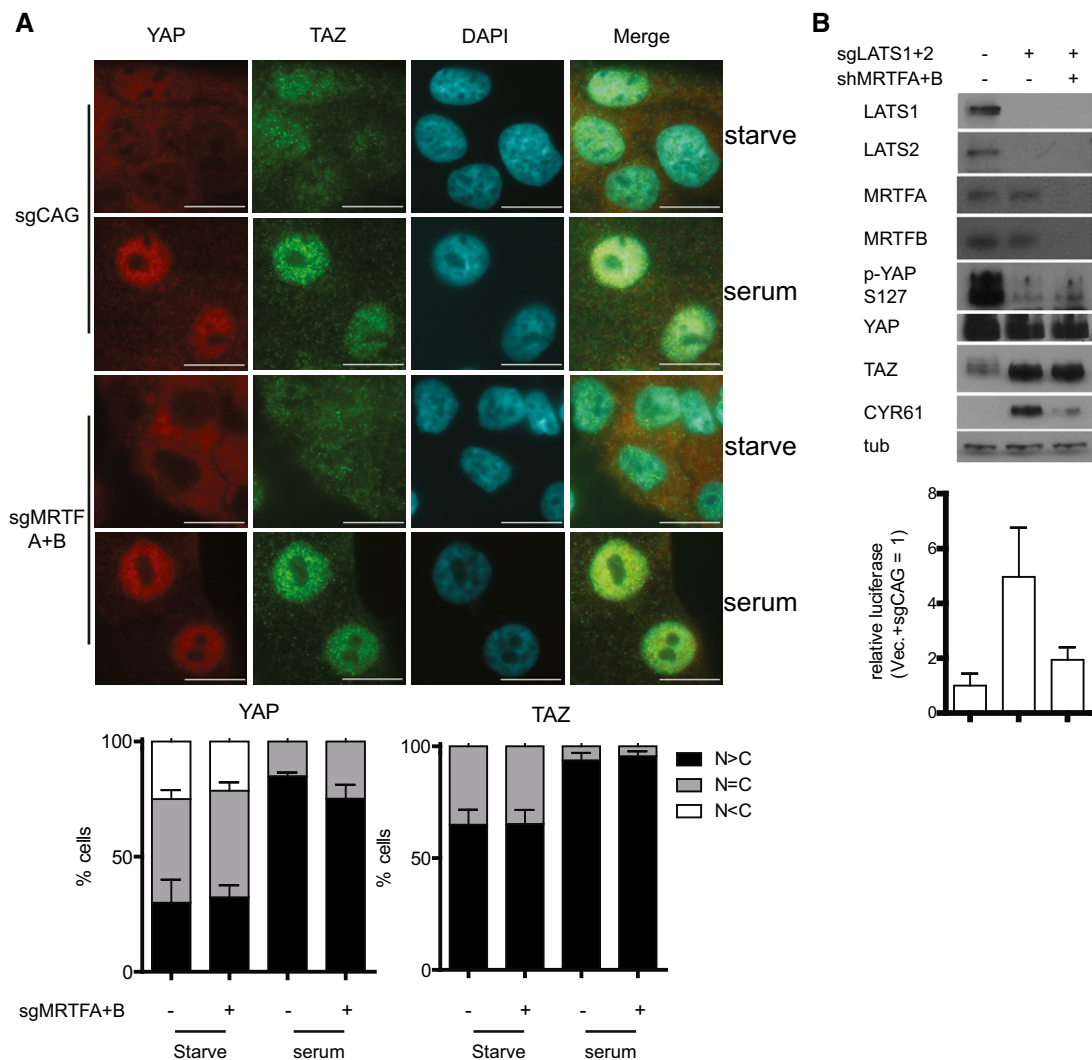

**Figure EV2. MRTF-mediated regulation of TEAD-YAP activity is independent of LATS.**

A Control (sgCAG) or MRTF-knockout (sgMRTFA+B) MCF-10A cells were serum-starved for 24 h and stimulated with complete medium for 1 h. Then, YAP and TAZ localization was examined with immunofluorescence. Quantifications for YAP (left) and TAZ (right) are shown below ( $n = 3$ , Scale bars: 10  $\mu$ m).

B Western blots and TEAD-YAP luciferase reporter assays with control (sgCAG) or LATS1/2-knockout (sgLATS1 + 2) 293T cells were treated with shRNAs against MRTFA and MRTFB ( $n = 3$ ).

Data Information: Data are presented as means  $\pm$  s.e.m.

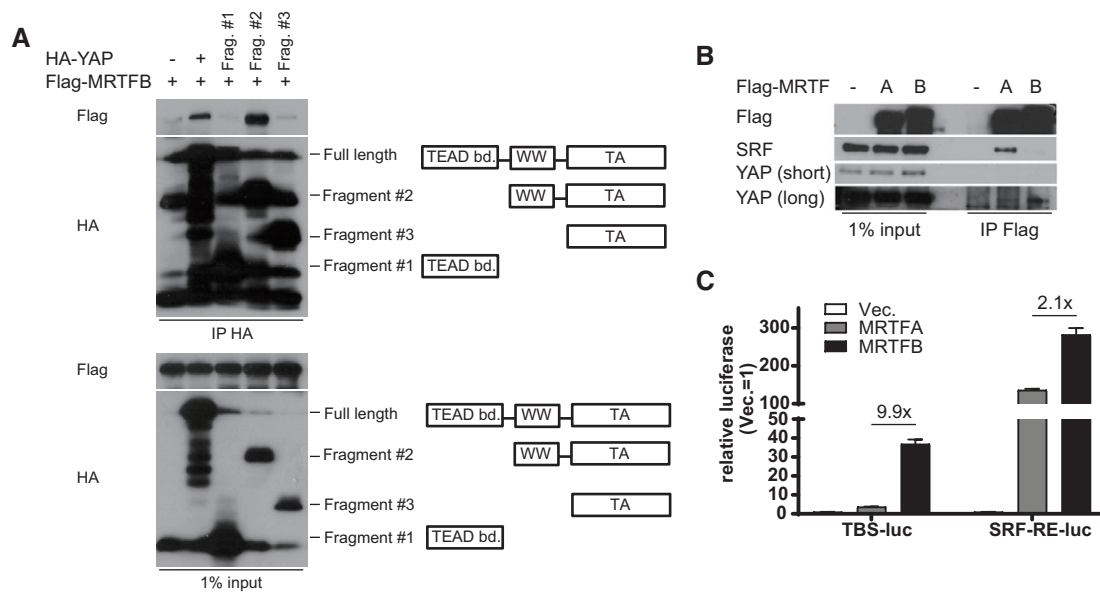

**Figure EV3. Characterization of MRTF binding to YAP.**

A Co-IP experiment with MRTFB and series of truncation mutants of YAP.

B Co-IP experiment with MRTFA or MRTFB with endogenous SRF and YAP. Note that MRTFA and MRTFB have different preferential binding partner.

C TEAD-activity reporter (TBS-luc) and SRF-activity reporter (SRF-RE-luc) assay with 293T cells expressing MRTFA or MRTFB ( $n = 3$ ). Data are presented as means  $\pm$  s.e.m.

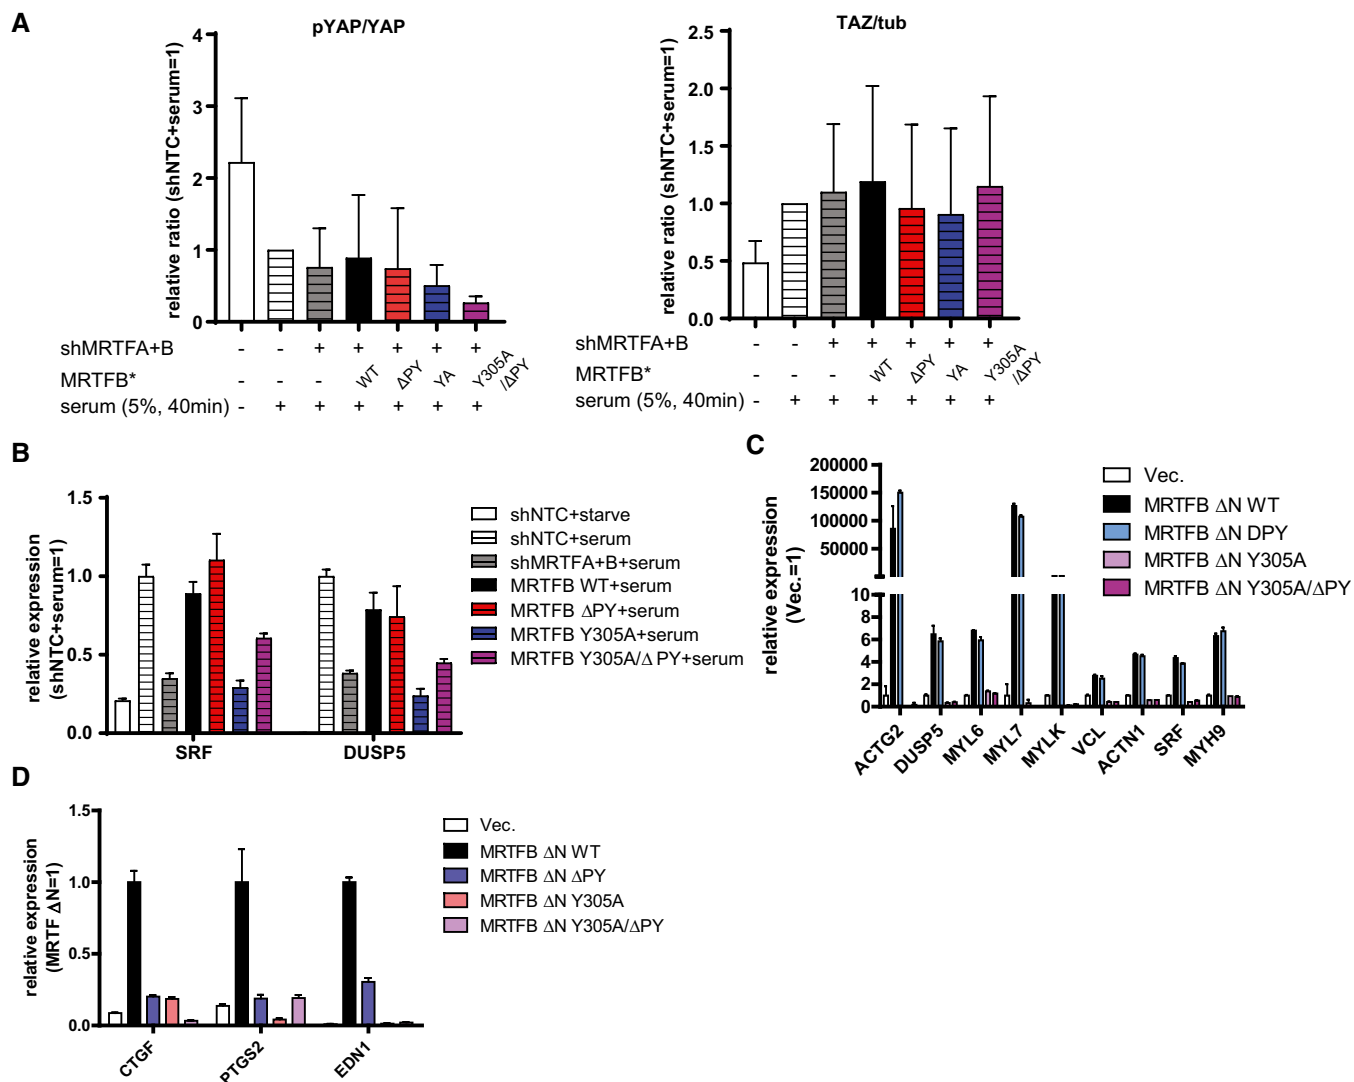

**Figure EV4. Regulation of TEAD-YAP and SRF-MRTF targets by MRTF mutants.**

A Quantifications of blot in Fig 4C ( $n = 4$ ).

B, C qPCR analysis for selected SRF-MRTF targets with cells generated in (B) Fig 4C and (C) Fig 4F ( $n = 3$ ).

D qPCR analysis for selected TEAD-YAP target genes in MDA-MB-231 cells expressing the indicated MRTFB mutant ( $n = 3$ ).

Data Information: Data are presented as means  $\pm$  s.e.m.

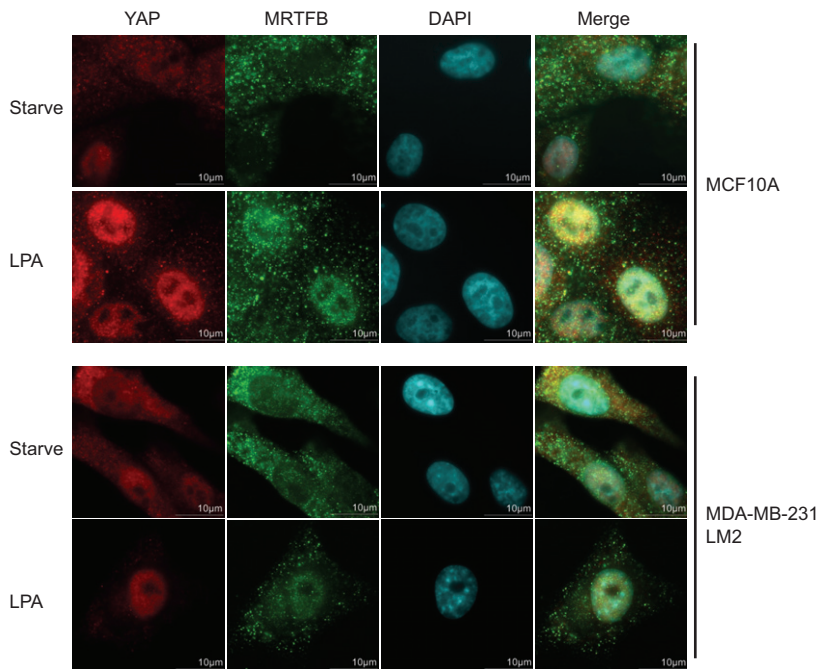

**Figure EV5. LPA induces nuclear co-localization of YAP and MRTF.**

Representative images of the indicated cell lines before and after LPA treatment.

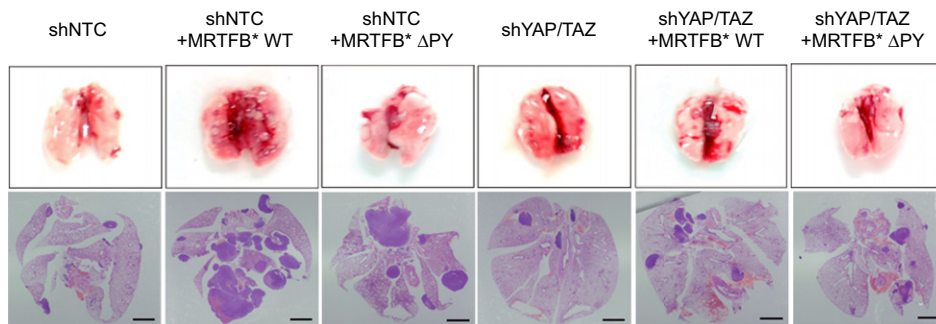

**Figure EV6. Representative images of *in vivo* metastasis assay in Fig 6j.**

Scale bars: 1 mm.

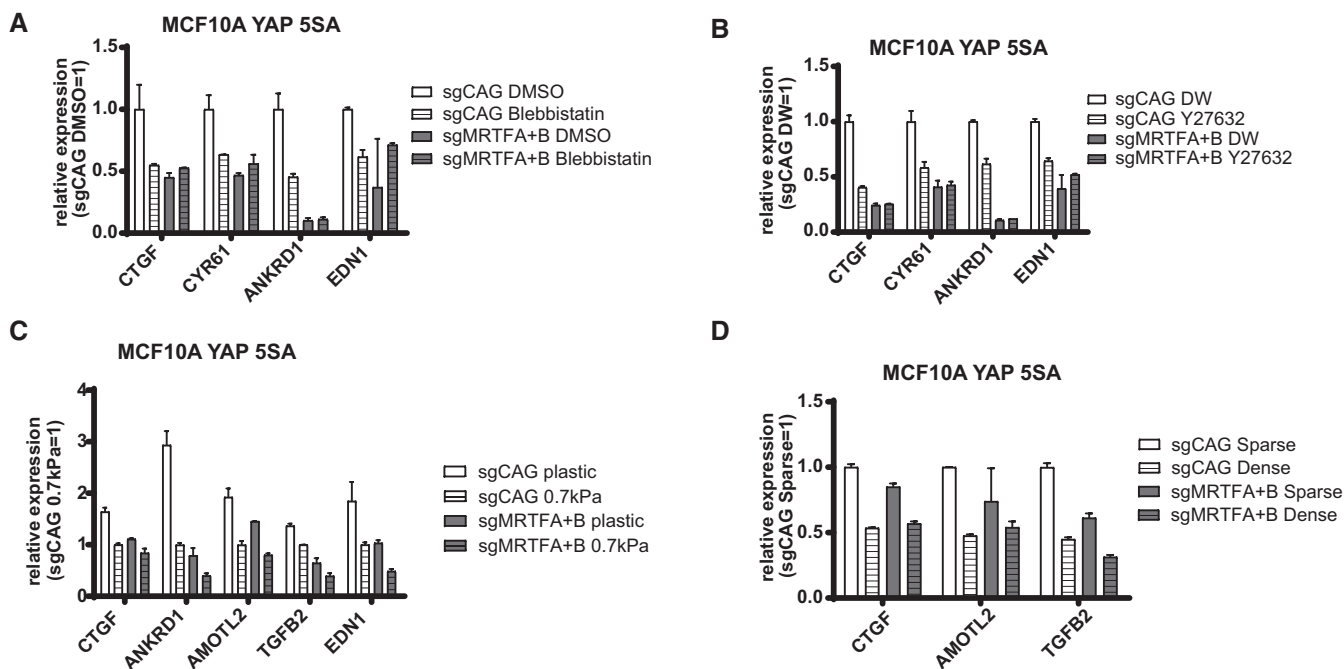

**Figure EV7. MRTF mediates LATS-independent acute mechanical regulation of YAP activity.**

A–D qPCR analysis of representative TEAD-YAP target genes for MCF-10A cells expressing YAP 5SA with sgRNA against control (sgCAG) and MRTFA and MRTFB (sgMRTFA+B) treated with (A) blebbistatin or solvent (DMSO), (B) Y27632 or solvent (distilled water, DW), (C) hard (tissue culture plastic) and soft (0.7 kPa) matrix, (D) sparse/dense cell density. Data are presented as means  $\pm$  s.e.m. ( $n = 2$  for each figure).
